# Supplementary material for: Epstein-Barr viral miRNAs inhibit antiviral CD4+ T cell responses targeting IL-12 and peptide processing
Source: PubMed Central journal article supplement — J Exp Med. 2016 Sep 19;213(10):2065–80. doi: 10.1084/jem.20160248 (PMC5030804; doi:10.1084/jem.20160248), 2016-09-19
Supplement: JEM_20160248_sm.pdf [file JEM_20160248_sm.pdf]

Table S1, available as an Excel file, is a list of gene transcripts down-regulated by EBV miRNAs in infected B cells. Transcript IDs (Ensembl Annotation Release 75), corresponding gene symbols, mean of  $\log_2$  fold changes, and z-scores are shown. In addition, transcripts are indicated (yes/no) according to the criteria of the RISC-IP enrichment score as defined in the Materials and methods.

Table S2. Donor HLA alleles

| Donor | HLA class I                               | HLA class II                                      |
|-------|-------------------------------------------|---------------------------------------------------|
| MB    | n.a.                                      | DRB1*0301,*0701                                   |
| JM    | n.a.                                      | DRB1*0801,*1301; DQB1*0402,*0603; DPB1*0401,*1301 |
| 32    | A*0201,*0301; B*3501,*1501; C*0102, *0401 | DRB1*1501,*0701; DQB1*0602,*0303; DPB1*0401       |

List of the donors' HLA alleles (determined by MVZ Martinsried, Germany) whose B and T cells have been used in co-culture experiments in this study. The HLA alleles were identified by deep-sequencing. n.a., not available.
